# Supplementary material for: Reversible and Noisy Progression towards a Commitment Point Enables Adaptable and Reliable Cellular Decision-Making
Source: PLOS journal article supplement (doi:10.1371/journal.pcbi.1002273), 2011-11-10
Supplement: S3 (10.1371/journal.pcbi.1002273.s003) [file journal.pcbi.1002273.s003]

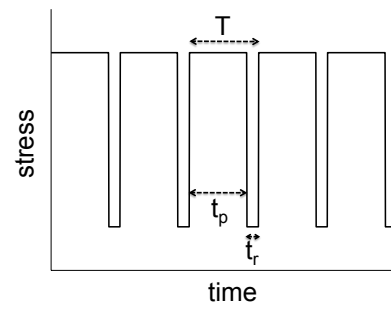

**Figure S3 | Stress modulation.**
